# Supplementary material for: Benzodiazepine Treatment and Hospital Course of Medical Inpatients With Alcohol Withdrawal Syndrome in the Veterans Health Administration
Source: PubMed Central journal article supplement — Mayo Clin Proc Innov Qual Outcomes. 2022 Feb 15;6(2):126–36. doi: 10.1016/j.mayocpiqo.2021.11.010 (PMC8855212; doi:10.1016/j.mayocpiqo.2021.11.010), 2022-02-15
Supplement: mmc1.pdf [file mmc1.pdf]

## **SUPPLEMENTARY ONLINE CONTENT**

**Supplemental Box 1.** ICD-9-CM diagnostic and procedure codes

**Supplemental Box 2.** Calculation of mg-diazepam-equivalents from other benzodiazepines

**Supplemental Table 1.** Non-benzodiazepine medications for alcohol withdrawal syndrome (AWS)

**Supplemental Figure 1.** Patient sample

**Supplemental Table 2.** Comorbid Inpatient Diagnosis Categories, Labels, and ICD-9-CM Codes

**Supplemental Table 3.** Medications for alcohol withdrawal syndrome (AWS) received by medical inpatients in the Veterans Health Administration during 2013

**Supplemental Table 4.** Medications and benzodiazepine dosing strategies received by medical inpatients with alcohol withdrawal syndrome (AWS) in the Veterans Health Administration during 2013

**Supplemental Figure 2.** Proportion of medical inpatients receiving each benzodiazepine dosing strategy by hospital in the Veterans Health Administration during 2013

**Supplemental Table 5.** Adjusted associations between patient characteristics, hospital prescribing pattern, and each benzodiazepine dosing strategy for alcohol withdrawal syndrome (AWS) among medical inpatients in the Veterans Health Administration during 2013, with hospital site as a random effect

**Supplemental Table 6.** Associations between benzodiazepine dosing strategy for alcohol withdrawal syndrome (AWS) and cumulative benzodiazepine exposure, intensive care, and intubation during hospital days 0-10, unadjusted and adjusted for patient characteristics in the Veterans Health Administration during 2013, with hospital site as a random effect

### **Supplemental References**

This supplementary material has been provided by the authors to give readers additional information about their work.

### Supplemental Box 1. ICD-9-CM diagnostic and procedure codes

Alcohol Withdrawal Syndrome:

- Diagnostic Codes: 291.0, 291.3, 291.5, 291.8, 291.81
- Procedure Codes: 94.62, 94.63, 94.68, 94.69

Alcohol Use Disorder:

- Diagnostic Codes: 303.x and 305.0x

Intubation

- Procedure Codes: 31.1, 96.04, 96.05, 96.70, 96.71, 96.72

### Supplemental Box 2. Calculation of mg-diazepam-equivalents from other benzodiazepines

10 mg of diazepam =

- 1 mg of lorazepam
- 25 mg of chlordiazepoxide
- 2 mg of midazolam
- 20 mg of oxazepam
- 20 mg of temazepam
- 0.5 mg of clonazepam
- 1 mg of alprazolam
- 15 mg of clorazepate

### Supplemental Table 1. Non-benzodiazepine medications for alcohol withdrawal syndrome (AWS)

| Medication                        | Mechanism                                                                                                                                                                                                                      |
|-----------------------------------|--------------------------------------------------------------------------------------------------------------------------------------------------------------------------------------------------------------------------------|
| Baclofen <sup>1-3</sup>           | GABA <sub>B</sub> agonist                                                                                                                                                                                                      |
| Carbamazepine <sup>4-10</sup>     | Stabilizes neuronal membranes by inhibiting voltage-sensitive sodium channels and/or calcium channels                                                                                                                          |
| Clonidine <sup>10-13</sup>        | $\alpha_2$ agonist                                                                                                                                                                                                             |
| Dexmedetomidine <sup>14-22</sup>  | Selective $\alpha_2$ agonist                                                                                                                                                                                                   |
| Ethanol <sup>23-25</sup>          | GABA <sub>A</sub> agonist, NMDA antagonist                                                                                                                                                                                     |
| Gabapentin <sup>26-30</sup>       | Stabilizes neuronal membranes by inhibiting voltage-gated calcium channels;<br>structurally related to GABA but does not appear to bind receptor                                                                               |
| Ketamine <sup>31-33</sup>         | NMDA antagonist                                                                                                                                                                                                                |
| Oxcarbazepine <sup>34</sup>       | Stabilizes neuronal membranes by inhibiting voltage-sensitive sodium channels and/or calcium channels                                                                                                                          |
| Phenobarbital <sup>26,35-39</sup> | GABA <sub>A</sub> agonist, NMDA antagonist                                                                                                                                                                                     |
| Pregabalin <sup>40</sup>          | Stabilizes neuronal membranes by inhibiting voltage-gated calcium channels                                                                                                                                                     |
| Propofol <sup>14,17,41-43</sup>   | GABA <sub>A</sub> agonist, NMDA antagonist                                                                                                                                                                                     |
| Valproic acid <sup>8,44-49</sup>  | Stabilizes neuronal membranes by inhibiting voltage-gated sodium channels; binding to presynaptic GABA <sub>B</sub> receptors may increase release of GABA; increases GABA synthesis by activating glutamic acid decarboxylase |

Legend: GABA =  $\gamma$ -aminobutyric acid; NMDA = *N*-methyl-D-aspartate

**Supplemental Table 2. Comorbid Inpatient Diagnosis Categories, Labels, and ICD-9-CM Codes**

| Diagnosis Category                            | Diagnosis Label                                                             | ICD-9-CM Code                           |
|-----------------------------------------------|-----------------------------------------------------------------------------|-----------------------------------------|
| Mental health disorder                        | Schizophrenic disorders                                                     | 295.x                                   |
|                                               | Episodic mood disorders (bipolar disorders, depressive disorders)           | 296.x, 311                              |
|                                               | Delusional disorders                                                        | 297.x                                   |
|                                               | Other nonorganic psychoses                                                  | 298.x                                   |
|                                               | Anxiety, dissociative and somatoform disorders                              | 300.x                                   |
|                                               | Personality disorders                                                       | 301.x                                   |
|                                               | Eating disorders                                                            | 307.x                                   |
|                                               | Acute reaction to stress                                                    | 308.x                                   |
|                                               | Adjustment reaction (including PTSD)                                        | 309.x                                   |
|                                               | Other psychosocial circumstances (suicidal ideation and homicidal ideation) | V62.x                                   |
|                                               | Suicide                                                                     | E950.x – E958.x                         |
| Nutrition, electrolyte, or acid-base disorder | Other disorders of pancreatic internal secretion                            | 251.x                                   |
|                                               | Kwashiorkor                                                                 | 260.x                                   |
|                                               | Nutritional marasmus                                                        | 261.x                                   |
|                                               | Other severe protein-calorie malnutrition                                   | 262.x                                   |
|                                               | Other and unspecified protein-calorie malnutrition                          | 263.x                                   |
|                                               | Vitamin A deficiency                                                        | 264.x                                   |
|                                               | Thiamine and niacin deficiency states                                       | 265.x                                   |
|                                               | Deficiency of b-complex components                                          | 266.x                                   |
|                                               | Ascorbic acid deficiency                                                    | 267.x                                   |
|                                               | Vitamin D deficiency                                                        | 268.x                                   |
|                                               | Other nutritional deficiencies                                              | 269.x                                   |
|                                               | Disorders of mineral metabolism                                             | 275.x                                   |
|                                               | Disorders of fluid electrolyte and acid-base balance                        | 276.x                                   |
|                                               | Iron deficiency anemias                                                     | 280.x                                   |
|                                               | Other deficiency anemias                                                    | 281.x                                   |
| GI tract disorder                             | Cholera                                                                     | 1.x                                     |
|                                               | Salmonella gastroenteritis                                                  | 3                                       |
|                                               | Shigellosis                                                                 | 4.x                                     |
|                                               | Amebiasis (apart from causing liver injury, pneumonia, skin lesions)        | 6, 6.1, 6.2                             |
|                                               | Other protozoal intestinal diseases                                         | 7.x                                     |
|                                               | Intestinal infections due to other organisms                                | 8.x                                     |
|                                               | Ill-defined intestinal infections                                           | 9.x                                     |
|                                               | Tuberculosis of intestines peritoneum and mesenteric glands                 | 14.x                                    |
|                                               | Tuberculosis of esophagus                                                   | 17.8x                                   |
|                                               | Gastrointestinal anthrax                                                    | 22.2                                    |
|                                               | Diphtheritic peritonitis                                                    | 32.83                                   |
|                                               | Abdominal actinomycotic infections                                          | 39.2                                    |
|                                               | Toxin-producing bacterial infections                                        | 41.41, 41.42, 41.43, 41.49, 41.86       |
|                                               | Epidemic vomiting syndrome                                                  | 78.82                                   |
|                                               | Syphilitic peritonitis                                                      | 95.2                                    |
|                                               | Gonococcal peritonitis                                                      | 98.86                                   |
|                                               | Chlamydia of peritoneum                                                     | 98.86                                   |
|                                               | Candidiasis of the esophagus                                                | 112.84                                  |
|                                               | Candidiasis of the intestine                                                | 112.85                                  |
|                                               | Other cestode infections                                                    | 123, 123.4                              |
|                                               | Ancylostomiasis and necatoriasis                                            | 126.x                                   |
|                                               | Esophageal varices (bleeding, without bleeding, etc)                        | 456.x                                   |
|                                               | Diseases of esophagus                                                       | 530.x                                   |
|                                               | Gastric ulcers                                                              | 531.x                                   |
|                                               | Duodenal ulcers                                                             | 532.x                                   |
|                                               | Peptic ulcer site unspecified                                               | 533.x                                   |
|                                               | Gastrojejunal ulcer                                                         | 534.x                                   |
|                                               | Gastritis and duodenitis                                                    | 535.x                                   |
|                                               | Disorders of function of stomach                                            | 536.x                                   |
|                                               | Other disorders of stomach and duodenum                                     | 537.x                                   |
|                                               | Complications of bariatric procedures                                       | 539.01, 539.09, 539.81, 539.89          |
|                                               | Appendicitis                                                                | 540, 540.1, 540.9, 541, 542, 543, 543.9 |
|                                               | Regional enteritis                                                          | 555.x                                   |
| Ulcerative enterocolitis                      | 556.x                                                                       |                                         |
| Vascular insufficiency of intestine           | 557.x                                                                       |                                         |

|                                         |                                                                                                               |                                            |
|-----------------------------------------|---------------------------------------------------------------------------------------------------------------|--------------------------------------------|
|                                         | Other and unspecified noninfectious gastroenteritis and colitis                                               | 558.1, 558.2, 558.3, 558.41, 558.42, 558.9 |
|                                         | Intestinal obstruction without mention of hernia                                                              | 560.x                                      |
|                                         | Diverticula of intestine                                                                                      | 562.x                                      |
|                                         | Functional digestive disorders not elsewhere classified                                                       | 564.x                                      |
|                                         | Anal fissure and fistula                                                                                      | 565.x                                      |
|                                         | Abscess of anal and rectal regions                                                                            | 566.x                                      |
|                                         | Peritonitis and retroperitoneal infections                                                                    | 567.x                                      |
|                                         | Other disorders of peritoneum                                                                                 | 568.x                                      |
|                                         | Other disorders of intestine                                                                                  | 569.x                                      |
|                                         | Gastrointestinal hemorrhage                                                                                   | 578.x                                      |
|                                         | Intestinal malabsorption (apart from pancreatic steatorrhea)                                                  | 579.x                                      |
|                                         | Other congenital anomalies of upper alimentary tract                                                          | 750.x                                      |
|                                         | Other congenital anomalies of digestive system (apart from pancreaticobiliary and liver)                      | 751.x                                      |
|                                         | Diarrhea                                                                                                      | 787.81                                     |
|                                         | Digestive system complication                                                                                 | 997.4, 997.49                              |
| Liver injury                            | Amebic liver abscess                                                                                          | 6.3                                        |
|                                         | Viral hepatitis                                                                                               | 70.x                                       |
|                                         | Mumps hepatitis                                                                                               | 72.71                                      |
|                                         | Secondary syphilitic hepatitis                                                                                | 91.62                                      |
|                                         | Syphilis of liver                                                                                             | 95.3                                       |
|                                         | Echinococcus granulosus infection of the liver                                                                | 122, 122.5, 122.8                          |
|                                         | Hepatitis due to toxoplasmosis                                                                                | 130.5                                      |
|                                         | Acute and subacute necrosis of liver                                                                          | 570                                        |
|                                         | Chronic liver disease and cirrhosis                                                                           | 571.x                                      |
|                                         | Liver abscess and sequelae of chronic liver disease                                                           | 572.x                                      |
|                                         | Other disorders of liver                                                                                      | 573.x                                      |
|                                         | Congenital cystic disease of liver                                                                            | 751.62                                     |
| Musculoskeletal or soft tissue disorder | Salmonella arthritis                                                                                          | 3.23                                       |
|                                         | Salmonella osteomyelitis                                                                                      | 3.24                                       |
|                                         | Amebic skin ulceration                                                                                        | 6.6                                        |
|                                         | Tuberculosis of bones and joints                                                                              | 15.x                                       |
|                                         | Tuberculosis of skin and subcutaneous tissues                                                                 | 17.0x                                      |
|                                         | Cutaneous anthrax                                                                                             | 22                                         |
|                                         | Cutaneous diphtheria                                                                                          | 32.85                                      |
|                                         | Erysipelas                                                                                                    | 35                                         |
|                                         | Cutaneous actinomycotic infections                                                                            | 39                                         |
|                                         | Gangrene                                                                                                      | 40, 785.4                                  |
|                                         | Tropical pyomyositis                                                                                          | 40.81                                      |
|                                         | Arthritis due to rubella                                                                                      |                                            |
|                                         | Leishmaniasis                                                                                                 | 85.x                                       |
|                                         | Syphilis of bone, muscle, synovium, tendon, or bursa                                                          | 95.5, 95.6, 95.7                           |
|                                         | Gonococcal arthritis, synovitis, tenosynovitis, bursitis, spondylitis, or other gonococcal infection of joint | 98.5, 98.51, 98.52, 98.53, 98.59           |
|                                         | Dermatophytosis                                                                                               | 110.x, 111.x                               |
|                                         | Lipoma of skin or subcutaneous tissue                                                                         | 214, 214.1, 214.9                          |
|                                         | Other benign neoplasm of connective or soft tissue                                                            | 215.x                                      |
|                                         | Varicose veins of lower extremities                                                                           | 454.x                                      |
|                                         | Inguinal hernia                                                                                               | 550.x                                      |
|                                         | Other hernias and complications of hernias                                                                    | 551.x, 552.x, 553.x                        |
|                                         | Psoas muscle abscess and other retroperitoneal abscesses and infections                                       | 567.31, 567.38, 567.39                     |
|                                         | Carbuncle or furuncle                                                                                         | 680.x                                      |
|                                         | Cellulitis or abscess of soft tissue or skeletal sites                                                        | 681.x, 682.x,                              |
|                                         | Pilonidal cyst with or without abscess                                                                        | 685.x                                      |
|                                         | Pyoderma and other infections of skin and soft tissue                                                         | 686.x                                      |
|                                         | Chronic ulcers of skin                                                                                        | 707.x                                      |
|                                         | Arthropathy associated with infections                                                                        | 711.x                                      |
|                                         | Crystal arthropathies                                                                                         | 712.x                                      |
|                                         | Rheumatoid arthritis and other inflammatory polyarthropathies                                                 | 714.x                                      |
|                                         | Osteoarthritis and allied disorders                                                                           | 715.x                                      |
|                                         | Allergic and climacteric arthritis                                                                            | 716.2x, 716.3x                             |
|                                         | Transient arthropathy                                                                                         | 716.4x                                     |
| Other arthritis                         | 716.5x, 716.6x                                                                                                |                                            |
| Other arthropathy                       | 716.8x, 716.9x                                                                                                |                                            |

|                               |                                                                                                                                                                             |                                                                                                                                                                                                                                                                                                                            |
|-------------------------------|-----------------------------------------------------------------------------------------------------------------------------------------------------------------------------|----------------------------------------------------------------------------------------------------------------------------------------------------------------------------------------------------------------------------------------------------------------------------------------------------------------------------|
|                               | Other joint derangement (e.g., effusions, hemarthrosis, stiffness)                                                                                                          | 717.x, 718.x, 719.x                                                                                                                                                                                                                                                                                                        |
|                               | Ankylosing spondylitis, other inflammatory spondylopathies, and spondylosis (aside from traumatic)                                                                          | 720.x, 721.x                                                                                                                                                                                                                                                                                                               |
|                               | Intervertebral disc disorders, disorders of the cervical region, and unspecified disorders of the back                                                                      | 722.x, 723.x, 724.x                                                                                                                                                                                                                                                                                                        |
|                               | Polymyalgia rheumatica                                                                                                                                                      | 725                                                                                                                                                                                                                                                                                                                        |
|                               | Peripheral enthesopathies and allied syndromes                                                                                                                              | 726.x                                                                                                                                                                                                                                                                                                                      |
|                               | Other disorders of synovium tendon and bursa                                                                                                                                | 727.x                                                                                                                                                                                                                                                                                                                      |
|                               | Other disorders of musculoskeletal tissues                                                                                                                                  | 728.x, 729.x, 737.x, 738.x, 782.2, 782.3                                                                                                                                                                                                                                                                                   |
|                               | Osteomyelitis                                                                                                                                                               | 730.x                                                                                                                                                                                                                                                                                                                      |
|                               | Osteopathies and osteochondropathies                                                                                                                                        | 731.x, 732.x, 733.x                                                                                                                                                                                                                                                                                                        |
|                               | Limb deformities and dysfunction                                                                                                                                            | 734.x, 735.x, 736.x, V49.x                                                                                                                                                                                                                                                                                                 |
|                               | Complications peculiar to orthopedic procedures                                                                                                                             | 996.4x, 996.77, 996.78, 996.79<br>996.9x, 997.6x                                                                                                                                                                                                                                                                           |
|                               | Wound issues related to procedures                                                                                                                                          | 998.32, 998.81, 998.83                                                                                                                                                                                                                                                                                                     |
| COPD                          | Chronic bronchitis                                                                                                                                                          | 490.x, 491.x                                                                                                                                                                                                                                                                                                               |
|                               | Emphysema                                                                                                                                                                   | 492, 492.8                                                                                                                                                                                                                                                                                                                 |
|                               | Chronic airway obstruction                                                                                                                                                  | 496                                                                                                                                                                                                                                                                                                                        |
| Other substance use condition | Drug-induced mental disorders                                                                                                                                               | 292, 292.11, 292.12, 292.2<br>292.21, 292.8x, 292.9                                                                                                                                                                                                                                                                        |
|                               | Drug dependence (opioid use disorders, sedative use disorders, cannabis use disorders, amphetamine use disorders, cocaine, hallucinogen, and other substance use disorders) | 304.x                                                                                                                                                                                                                                                                                                                      |
|                               | Nondependent abuse of drugs (examples as above)                                                                                                                             | 305.x                                                                                                                                                                                                                                                                                                                      |
|                               | Poisoning by analgesics, psychotropics, stimulants                                                                                                                          | 965, 965.01, 965.02, 965.09, 969.6,<br>970.81, 970.89, 989.89<br>989.9, E850.0, E850.1, E854.1                                                                                                                                                                                                                             |
| Cardiac dysrhythmia           |                                                                                                                                                                             | 426.x, 427.x, 785, 785.1                                                                                                                                                                                                                                                                                                   |
| Kidney injury                 | Syphilis of kidney                                                                                                                                                          | 95.4                                                                                                                                                                                                                                                                                                                       |
|                               | Acute and chronic glomerulonephritis                                                                                                                                        | 580.x, 582.x                                                                                                                                                                                                                                                                                                               |
|                               | Nephrotic syndrome                                                                                                                                                          | 581.x                                                                                                                                                                                                                                                                                                                      |
|                               | Other nephritis or nephropathy                                                                                                                                              | 583.x                                                                                                                                                                                                                                                                                                                      |
|                               | Acute kidney failure                                                                                                                                                        | 584.5, 584.6, 584.7, 584.8, 584.9                                                                                                                                                                                                                                                                                          |
|                               | Chronic kidney disease                                                                                                                                                      | 403, 403.01, 403.1, 403.11, 403.9,<br>403.91, 404, 404.02, 404.1, 404.9,<br>405.01, 405.11, 405.91, 585.x                                                                                                                                                                                                                  |
|                               | Disorders resulting from impaired renal function                                                                                                                            | 588.x                                                                                                                                                                                                                                                                                                                      |
|                               | Infections of kidney                                                                                                                                                        | 590.x                                                                                                                                                                                                                                                                                                                      |
|                               | Hydronephrosis                                                                                                                                                              | 591                                                                                                                                                                                                                                                                                                                        |
|                               | Other disorders of kidney and ureter                                                                                                                                        | 593.1, 593.71, 593.72, 593.73, 593.81,<br>593.89, 593.9                                                                                                                                                                                                                                                                    |
|                               | Congenital anomalies of urinary system                                                                                                                                      | 753.x                                                                                                                                                                                                                                                                                                                      |
| Dialysis                      | V45.1, V45.11, V45.12, V56.0, V56.1,<br>V56.2, V56.31, V56.32, V56.8                                                                                                        |                                                                                                                                                                                                                                                                                                                            |
| Diabetes mellitus             |                                                                                                                                                                             | 249.x, 250.x, 357.2, 362.01, 362.02,<br>362.03, 362.04, 362.05, 362.06, 362.07                                                                                                                                                                                                                                             |
| Trauma                        | Traumatic spondylopathy                                                                                                                                                     | 721.7                                                                                                                                                                                                                                                                                                                      |
|                               | Pain due to trauma                                                                                                                                                          | 338.11, 339.2, 339.21                                                                                                                                                                                                                                                                                                      |
|                               | Trauma to specific body parts, including burns                                                                                                                              | 388.11, 716.1x, 721.7, 800.x – 854.x,<br>860.x – 887.x, 890.x – 897.x, 900.x –<br>904.x, 910.x – 959.x                                                                                                                                                                                                                     |
|                               | Complications of trauma                                                                                                                                                     | 518.5, 525.11                                                                                                                                                                                                                                                                                                              |
|                               | Trauma from accidents, collisions, fights, other mechanisms                                                                                                                 | E800.x – E807.x, E810.x – E829.x,<br>E831.x, E833.x – E838.x, E840.x –<br>E849.x, E870.x, E880.x – E888.x,<br>E890.x – E900.x, E902.x – E904.x,<br>E906.x – E909.x, E914.x – E925.x,<br>E960.x, E961.x, E963.x, E965.x, E966.x,<br>E968.x, E970.x, E973.x – E976.x,<br>E983.x, E985.x – E988.x, E990.x –<br>E996.x, E998.x |
| Seizure                       |                                                                                                                                                                             | 345.x, 780.3, 780.31, 780.32, 780.33,<br>780.39                                                                                                                                                                                                                                                                            |
| Pancreaticobiliary disease    | Mumps pancreatitis                                                                                                                                                          | 72.3                                                                                                                                                                                                                                                                                                                       |
|                               | Cholelithiasis                                                                                                                                                              | 574.x                                                                                                                                                                                                                                                                                                                      |

|                          |                                                                |                                                                                                                                                                                                                                                                                                                                                                     |
|--------------------------|----------------------------------------------------------------|---------------------------------------------------------------------------------------------------------------------------------------------------------------------------------------------------------------------------------------------------------------------------------------------------------------------------------------------------------------------|
|                          | Other disorders of gallbladder or biliary tract                | 575.x, 576.x, 997.41                                                                                                                                                                                                                                                                                                                                                |
|                          | Disease of pancreas                                            | 577, 577.1, 577.2, 577.8, 577.9                                                                                                                                                                                                                                                                                                                                     |
|                          | Pancreatic steatorrhea                                         | 579.4                                                                                                                                                                                                                                                                                                                                                               |
|                          | Congenital anomaly of gallbladder, biliary system, or pancreas | 751.6, 751.61, 751.62, 751.69                                                                                                                                                                                                                                                                                                                                       |
|                          | Biliary atresia, congenital                                    | 751.61                                                                                                                                                                                                                                                                                                                                                              |
| Pneumonia                | Infectious pneumonia                                           | 3.22, 6.4, 10.x, 11.x, 21.2, 22.1, 31.x, 39.1, 52.1, 55.1, 73, 95.1, 114, 114.4, 114.5, 114.9, 115.05, 115.15, 115.95, 130.4, 480 – 480.3, 480.8, 480.9, 481 – 482.32, 482.39, 482.4 – 482.42, 482.49, 482.8 – 482.84, 482.89, 482.9, 483, 483.1, 483.8, 484.1, 484.3, 484.5, 484.6, 484.7, 484.8, 485, 486, 487, 488.01, 488.11, 488.81, 510, 513, 997.31, 997.32, |
|                          | Non-infectious pneumonia                                       | 495.x, 500, 502 – 506, 516.3, 516.32, 516.33, 516.35 – 516.37, 516.5, 516.8, 516.9, 517.1, 518.3, 714.81                                                                                                                                                                                                                                                            |
| Sepsis/Shock             |                                                                | 3.1, 22.3, 38.x, 40.82, 458.2, 458.21, 458.29, 458.8, 458.9, 785.5, 785.51, 785.52, 785.59, 995.x, 998                                                                                                                                                                                                                                                              |
| Congestive heart failure |                                                                | 398.91, 402.01, 402.11, 402.91, 404.01, 404.03, 404.11, 404.13, 404.91, 404.93, 428.x, 429.83,                                                                                                                                                                                                                                                                      |
| Malignancy               |                                                                | 140.x – 165.x, 170.x – 176.x, 179, 180.x – 209.x, 233.x, 234, 234.8, 234.9, 238.6                                                                                                                                                                                                                                                                                   |
| Cerebrovascular disease  | Vascular dementias                                             | 290.4, 290.41, 290.42, 290.43                                                                                                                                                                                                                                                                                                                                       |
|                          | Retinal vascular occlusion                                     | 363.3x                                                                                                                                                                                                                                                                                                                                                              |
|                          | Subarachnoid hemorrhage                                        | 430                                                                                                                                                                                                                                                                                                                                                                 |
|                          | Intracerebral hemorrhage                                       | 431                                                                                                                                                                                                                                                                                                                                                                 |
|                          | Occlusion or stenosis of precerebral and cerebral arteries     | 432.x, 433.x, 434.x                                                                                                                                                                                                                                                                                                                                                 |
|                          | Transient cerebral ischemia                                    | 435.x                                                                                                                                                                                                                                                                                                                                                               |
|                          | Other cerebrovascular disease                                  | 436, 437.x, 438.x,                                                                                                                                                                                                                                                                                                                                                  |
| Myocardial infarction    |                                                                | 410.x, 412                                                                                                                                                                                                                                                                                                                                                          |

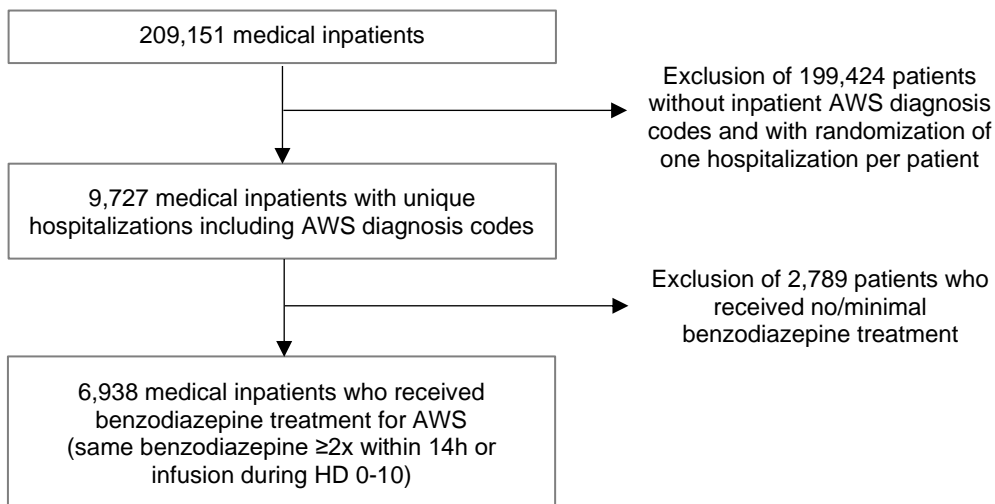

### Supplemental Figure 1. Patient sample

Legend: AWS = alcohol withdrawal syndrome

**Supplemental Table 3. Medications for alcohol withdrawal syndrome (AWS) received by medical inpatients in the Veterans Health Administration during 2013**

| Medications                        | n = 6,938 |        |
|------------------------------------|-----------|--------|
|                                    | no.       | (%)    |
| Short-acting Benzodiazepines       |           |        |
| Lorazepam                          | 5518      | (79.5) |
| Midazolam                          | 323       | (4.7)  |
| Oxazepam                           | 237       | (3.4)  |
| Temazepam                          | 159       | (2.3)  |
| Alprazolam                         | 77        | (1.1)  |
| Clorazepate                        | 49        | (0.7)  |
| Long-acting Benzodiazepines        |           |        |
| Chlordiazepoxide                   | 2490      | (35.9) |
| Diazepam                           | 1003      | (14.5) |
| Clonazepam                         | 140       | (2.0)  |
| Non-benzodiazepine AWS medications |           |        |
| Gabapentin                         | 1149      | (16.6) |
| Clonidine                          | 686       | (9.9)  |
| Propofol                           | 207       | (3.0)  |
| Valproic acid/Divalproex/Valproate | 206       | (3.0)  |
| Dexmedetomidine                    | 169       | (2.4)  |
| Baclofen                           | 127       | (1.8)  |
| Carbamazepine                      | 100       | (1.4)  |
| Phenobarbital                      | 44        | (0.6)  |
| Pregabalin                         | 32        | (0.5)  |
| Oxcarbazepine                      | 4         | (0.1)  |
| Ethanol                            | 0         | (0.0)  |
| Ketamine                           | 0         | (0.0)  |
| Antipsychotics <sup>a</sup>        |           |        |
| Haloperidol                        | 759       | (10.9) |
| Quetiapine                         | 564       | (8.1)  |
| Risperidone                        | 232       | (3.3)  |
| Olanzapine                         | 167       | (2.4)  |
| Chlorpromazine                     | 28        | (0.4)  |

Legend: Treatments above are not mutually exclusive

<sup>a</sup>Common antipsychotic agents were included as possible adjuvant therapies, although antipsychotics are not considered primary treatment for AWS<sup>50</sup>

**Supplemental Table 4. Medications and benzodiazepine dosing strategies received by medical inpatients with alcohol withdrawal syndrome (AWS) in the Veterans Health Administration during 2013**

|                                            | Fixed-dose |        | Symptom-triggered |        | Front-loading |        | p-value |
|--------------------------------------------|------------|--------|-------------------|--------|---------------|--------|---------|
|                                            | no.        | (%)    | no.               | (%)    | no.           | (%)    |         |
| Received Short-acting Benzodiazepine       | 2,086      | (73.7) | 2,597             | (89.3) | 1,109         | (92.4) | <0.001  |
| Received Long-acting Benzodiazepine        | 1,654      | (58.5) | 1,140             | (39.2) | 688           | (57.3) | <0.001  |
| Received Non-Benzodiazepine AWS Medication | 789        | (27.9) | 1,018             | (35.0) | 423           | (35.3) | <0.001  |
| Received Antipsychotic Medication          | 518        | (18.3) | 662               | (22.8) | 331           | (27.6) | <0.001  |

Legend: chi-squared tests were used to assess differences across groups

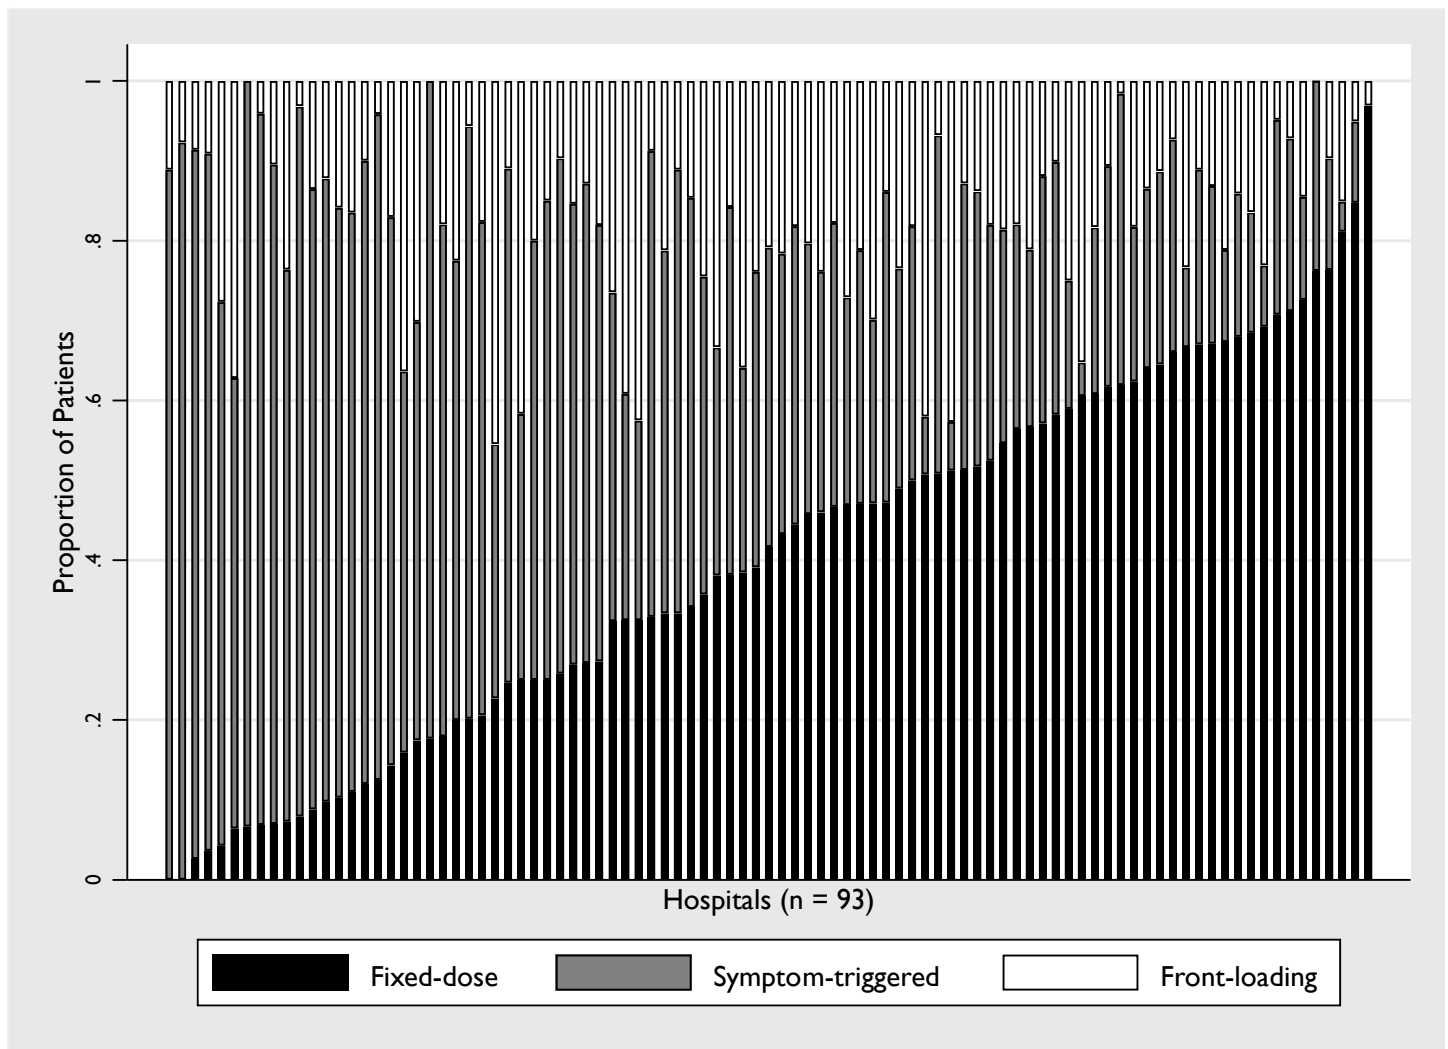

**Supplemental Figure 2. Proportion of medical inpatients receiving each benzodiazepine dosing strategy by hospital in the Veterans Health Administration during 2013**



**Supplemental Table 5. Adjusted associations between patient characteristics, hospital prescribing pattern, and benzodiazepine dosing strategy for alcohol withdrawal syndrome (AWS) among medical inpatients in the Veterans Health Administration during 2013, with hospital site as a random effect**

|                                                                      | Fixed-dose Therapy |           |        |             | Symptom-triggered Therapy |            |        |             | Front-loading Therapy |            |        |             |
|----------------------------------------------------------------------|--------------------|-----------|--------|-------------|---------------------------|------------|--------|-------------|-----------------------|------------|--------|-------------|
|                                                                      | OR                 | (95% CI)  | Pred % | (95% CI)    | OR                        | (95% CI)   | Pred % | (95% CI)    | OR                    | (95% CI)   | Pred % | (95% CI)    |
| <40 yo                                                               | ref.               |           | 36.5   | (31.5-41.5) | ref.                      |            | 44.4   | (39.6-49.2) | ref.                  |            | 17.5   | (13.8-21.1) |
| 40-49 yo                                                             | 1.0                | (0.8-1.4) | 37.3   | (33.2-41.3) | 0.9                       | (0.7-1.2)  | 42.3   | (38.6-46.0) | 1.1                   | (0.8- 1.5) | 19.0   | (16.3-21.6) |
| 50-59 yo                                                             | 1.2                | (0.9-1.5) | 39.0   | (35.6-42.4) | 0.8                       | (0.6-1.0)  | 40.5   | (37.6-43.4) | 1.1                   | (0.9- 1.5) | 19.2   | (17.4-21.0) |
| 60-69 yo                                                             | 1.3                | (1.0-1.6) | 40.5   | (37.1-44.0) | 0.9                       | (0.7-1.2)  | 42.8   | (39.8-45.7) | 0.9                   | (0.6- 1.2) | 15.5   | (13.9-17.1) |
| 70+ yo                                                               | 1.7**              | (1.2-2.4) | 46.2   | (41.0-51.4) | 0.9                       | (0.6-1.2)  | 41.9   | (37.2-46.7) | 0.6**                 | (0.4- 0.8) | 10.9   | (8.0-13.7)  |
| Male                                                                 | 1.1                | (0.8-1.5) | 39.7   | (36.5-42.8) | 0.9                       | (0.6-1.2)  | 41.8   | (39.2-44.4) | 1.1                   | (0.7- 1.6) | 17.1   | (15.9-18.3) |
| White                                                                | ref.               |           | 38.6   | (35.4-41.8) | ref.                      |            | 42.6   | (39.9-45.3) | ref.                  |            | 17.4   | (16.1-18.8) |
| Black                                                                | 1.4**              | (1.2-1.6) | 44.6   | (40.6-48.7) | 0.8*                      | (0.7-1.0)  | 39.2   | (35.6-42.7) | 0.8*                  | (0.7- 1.0) | 15.1   | (12.9-17.2) |
| Hispanic/Latinx                                                      | 0.7                | (0.5-1.0) | 33.3   | (27.4-39.1) | 1.1                       | (0.8-1.5)  | 45.0   | (39.0-51.0) | 1.2                   | (0.9- 1.6) | 19.5   | (15.1-24.0) |
| Other Race                                                           | 1.3                | (0.9-1.8) | 42.9   | (35.8-50.0) | 0.7*                      | (0.5-0.9)  | 35.2   | (28.9-41.5) | 1.1                   | (0.8- 1.7) | 19.4   | (13.9-24.9) |
| Unknown Race                                                         | 1.1                | (0.8-1.6) | 41.0   | (34.6-47.3) | 1.0                       | (0.8-1.4)  | 43.3   | (37.4-49.3) | 0.8                   | (0.6- 1.2) | 14.7   | (10.4-19.0) |
| Single                                                               | 0.9                | (0.8-1.1) | 39.4   | (36.3-42.6) | 1.1                       | (1.0-1.3)  | 42.3   | (39.6-44.9) | 0.9                   | (0.8- 1.1) | 16.9   | (15.7-18.2) |
| Homeless                                                             | 1.1                | (1.0-1.2) | 40.7   | (37.1-44.3) | 1.0                       | (0.9-1.1)  | 41.5   | (38.4-44.6) | 0.9                   | (0.8- 1.1) | 16.3   | (14.5-18.1) |
| Prior year AUD                                                       | 1.2*               | (1.0-1.5) | 40.1   | (37.0-43.3) | 1.0                       | (0.8-1.2)  | 41.8   | (39.2-44.5) | 0.8*                  | (0.6- 1.0) | 16.7   | (15.4-17.9) |
| Prior year AWS                                                       | 0.9*               | (0.8-1.0) | 38.3   | (35.0-41.6) | 1.0                       | (0.9-1.1)  | 41.8   | (39.0-44.6) | 1.3**                 | (1.1- 1.5) | 18.6   | (17.0-20.2) |
| Mental health disorders                                              | 0.9                | (0.8-1.0) | 38.8   | (35.5-42.1) | 1.2*                      | (1.0-1.3)  | 43.2   | (40.3-46.0) | 1.0                   | (0.8- 1.1) | 16.8   | (15.3-18.3) |
| Nutrition, electrolyte, or acid-base DO                              | 1.0                | (0.9-1.2) | 39.9   | (36.5-43.2) | 0.9                       | (0.8-1.1)  | 41.4   | (38.5-44.2) | 1.0                   | (0.9- 1.2) | 17.4   | (15.8-18.9) |
| GI tract DO                                                          | 1.0                | (0.9-1.2) | 40.2   | (36.7-43.7) | 1.0                       | (0.9-1.1)  | 41.5   | (38.6-44.5) | 1.0                   | (0.9- 1.1) | 16.9   | (15.2-18.6) |
| Liver injury                                                         | 1.0                | (0.9-1.1) | 39.8   | (36.3-43.3) | 1.0                       | (0.9-1.1)  | 41.6   | (38.6-44.7) | 1.0                   | (0.9- 1.2) | 17.3   | (15.6-19.1) |
| Musculoskeletal or soft tissue DO                                    | 1.0                | (0.9-1.1) | 39.3   | (35.7-42.8) | 1.1                       | (1.0-1.2)  | 43.1   | (40.0-46.2) | 0.9                   | (0.8- 1.0) | 16.1   | (14.3-17.9) |
| COPD                                                                 | 1.1                | (1.0-1.3) | 41.0   | (37.2-44.7) | 0.9                       | (0.8-1.1)  | 41.1   | (37.8-44.4) | 0.9                   | (0.8- 1.1) | 16.1   | (14.1-18.2) |
| Other substance use condition                                        | 0.9                | (0.8-1.1) | 38.7   | (34.9-42.5) | 1.1                       | (0.9-1.3)  | 43.4   | (39.9-46.8) | 1.0                   | (0.8- 1.1) | 16.7   | (14.5-18.9) |
| Cardiac dysrhythmia                                                  | 0.9                | (0.8-1.1) | 38.6   | (34.7-42.5) | 1.0                       | (0.9-1.2)  | 42.1   | (38.6-45.7) | 1.1                   | (0.9- 1.3) | 18.0   | (15.6-20.4) |
| Kidney injury                                                        | 0.8**              | (0.6-0.9) | 35.3   | (31.3-39.3) | 1.1                       | (0.9-1.3)  | 43.5   | (39.7-47.4) | 1.3**                 | (1.1- 1.6) | 20.2   | (17.4-23.0) |
| Diabetes mellitus                                                    | 1.1                | (0.9-1.3) | 40.6   | (36.5-44.8) | 1.0                       | (0.8-1.2)  | 41.5   | (37.7-45.2) | 0.9                   | (0.8- 1.1) | 16.3   | (13.7-18.9) |
| Trauma                                                               | 0.9                | (0.7-1.1) | 37.5   | (33.3-41.8) | 1.0                       | (0.9-1.2)  | 42.6   | (38.6-46.6) | 1.1                   | (0.9- 1.4) | 18.5   | (15.6-21.4) |
| Seizure                                                              | 1.1                | (0.9-1.4) | 41.7   | (37.2-46.1) | 0.7**                     | (0.6-0.8)  | 35.9   | (32.0-39.9) | 1.3**                 | (1.1- 1.7) | 20.8   | (17.8-23.9) |
| Pancreaticobiliary disease                                           | 0.8*               | (0.6-0.9) | 35.6   | (31.3-40.0) | 1.2                       | (1.0-1.4)  | 44.8   | (40.7-49.0) | 1.1                   | (0.9- 1.4) | 18.4   | (15.4-21.3) |
| Pneumonia                                                            | 0.8*               | (0.6-1.0) | 35.1   | (30.3-39.8) | 0.9                       | (0.8-1.2)  | 41.0   | (36.3-45.6) | 1.5**                 | (1.2- 2.0) | 22.8   | (18.9-26.7) |
| Sepsis/Shock                                                         | 0.8                | (0.6-1.0) | 35.8   | (30.8-40.9) | 1.0                       | (0.8-1.3)  | 42.3   | (37.4-47.2) | 1.2                   | (0.9- 1.6) | 19.5   | (15.8-23.1) |
| Congestive heart failure                                             | 0.8                | (0.6-1.1) | 36.2   | (30.8-41.6) | 1.2                       | (0.9-1.6)  | 45.6   | (40.1-51.0) | 1.1                   | (0.8- 1.4) | 17.8   | (13.6-21.9) |
| Malignancy                                                           | 1.3                | (0.9-1.7) | 43.8   | (37.5-50.1) | 1.0                       | (0.7-1.4)  | 41.9   | (35.8-48.1) | 0.6*                  | (0.4- 1.0) | 11.9   | (7.8-16.0)  |
| Cerebrovascular disease                                              | 1.0                | (0.7-1.4) | 39.7   | (33.0-46.3) | 1.0                       | (0.7-1.4)  | 41.3   | (34.7-47.9) | 1.0                   | (0.7- 1.6) | 17.7   | (12.4-23.0) |
| Myocardial infarction                                                | 0.7                | (0.5-1.1) | 34.3   | (26.8-41.7) | 0.8                       | (0.5-1.2)  | 38.4   | (30.9-46.0) | 1.7*                  | (1.1- 2.5) | 24.6   | (17.8-31.4) |
| Not top-tercile hospital for prescribing dosing strategy of interest | ref.               |           | 26.7   | (23.0-30.4) | ref.                      |            | 27.1   | (23.9-30.3) | ref.                  |            | 12.3   | (11.1-13.6) |
| Top-tercile hospital for prescribing dosing strategy of interest     | 6.5**              | (4.5-9.3) | 65.0   | (59.2-70.9) | 8.3**                     | (6.1-11.3) | 72.0   | (67.4-76.7) | 3.0**                 | (2.5- 3.6) | 28.8   | (25.9-31.6) |

Legend: OR = Odds Ratio, CI = Confidence Interval, DO = Disorder, GI = Gastrointestinal, COPD = Chronic obstructive pulmonary disease, \*\* = p<0.01, \* = p<0.05

Hospital intraclass correlation coefficient for fixed-dose therapy = 0.16 (95% CI 0.11-0.21), symptom-triggered therapy = 0.11 (95% CI 0.07-0.15), front-loading therapy = 0.02 (95% CI 0.01-0.05)

**Supplemental Table 6. Associations between benzodiazepine dosing strategy for alcohol withdrawal syndrome (AWS) and cumulative benzodiazepine exposure, intensive care, and intubation, unadjusted and adjusted for patient characteristics in the Veterans Health Administration in 2013**

|                                                | Cumulative Benzodiazepine <sup>a</sup><br>(mixed-effects linear regression) |               |               |                | ICU Care<br>(mixed-effects logistic regression) |           |            |           | Intubation<br>(mixed-effects logistic regression) |           |            |           |
|------------------------------------------------|-----------------------------------------------------------------------------|---------------|---------------|----------------|-------------------------------------------------|-----------|------------|-----------|---------------------------------------------------|-----------|------------|-----------|
|                                                | Unadj.<br>coef.                                                             | (95% CI)      | Adj.<br>coef. | (95% CI)       | Unadj.<br>OR                                    | (95% CI)  | Adj.<br>OR | (95% CI)  | Unadj.<br>OR                                      | (95% CI)  | Adj.<br>OR | (95% CI)  |
| <b>Fixed-dose</b>                              | ref.                                                                        |               | ref.          |                | ref.                                            |           | ref.       |           | ref.                                              |           | ref.       |           |
| <b>Symptom-triggered</b>                       | 30.5**                                                                      | (13.5-47.5)   | 26.4**        | (9.4-43.4)     | 1.7**                                           | (1.5-2.0) | 1.7**      | (1.4-2.0) | 1.6**                                             | (1.2-2.2) | 1.5*       | (1.1-2.1) |
| <b>Front-loading</b>                           | 175.9**                                                                     | (155.3-196.4) | 168.8**       | (148.2-189.4)  | 3.0**                                           | (2.6-3.6) | 2.2**      | (1.8-2.6) | 5.6**                                             | (4.2-7.4) | 4.9**      | (3.5-6.9) |
| Age                                            |                                                                             |               | -1.3**        | (-2.1- -0.6)   |                                                 |           | 1.0        | (1.0-1.0) |                                                   |           | 1.0        | (1.0-1.0) |
| Male                                           |                                                                             |               | 9.7           | (-32.0-51.4)   |                                                 |           | 0.9        | (0.6-1.4) |                                                   |           | 1.4        | (0.5-3.7) |
| White                                          |                                                                             |               | ref.          |                |                                                 |           | ref.       |           |                                                   | ref.      |            |           |
| Black                                          |                                                                             |               | -34.3**       | (-54.6- -13.9) |                                                 |           | 1.1        | (0.9-1.3) |                                                   |           | 0.7        | (0.5-1.1) |
| Hispanic/Latinx                                |                                                                             |               | -10.6         | (-48.5-27.2)   |                                                 |           | 0.9        | (0.6-1.3) |                                                   |           | 1.0        | (0.6-1.9) |
| Other Race                                     |                                                                             |               | -17.4         | (-60.2-25.5)   |                                                 |           | 1.0        | (0.7-1.5) |                                                   |           | 0.7        | (0.3-1.6) |
| Unknown Race                                   |                                                                             |               | 10.6          | (-28.5-49.7)   |                                                 |           | 1.2        | (0.9-1.8) |                                                   |           | 1.4        | (0.8-2.5) |
| Single                                         |                                                                             |               | 6.2           | (-11.4-23.7)   |                                                 |           | 1.0        | (0.8-1.2) |                                                   |           | 0.9        | (0.6-1.1) |
| Homeless                                       |                                                                             |               | 8.5           | (-7.5-24.5)    |                                                 |           | 0.7**      | (0.6-0.9) |                                                   |           | 0.8        | (0.6-1.1) |
| Mental health disorders                        |                                                                             |               | 3.6           | (-11.5-18.6)   |                                                 |           | 0.6**      | (0.6-0.8) |                                                   |           | 0.5**      | (0.4-0.7) |
| Nutrition, electrolyte, or acid-base disorder  |                                                                             |               | 22.1**        | (7.3-36.9)     |                                                 |           | 1.4**      | (1.2-1.6) |                                                   |           | 1.7**      | (1.3-2.3) |
| GI tract disorder                              |                                                                             |               | 5.9           | (-9.0-20.9)    |                                                 |           | 1.4**      | (1.2-1.6) |                                                   |           | 1.4**      | (1.1-1.8) |
| Liver injury                                   |                                                                             |               | 6.6           | (-8.8-22.0)    |                                                 |           | 1.0        | (0.9-1.1) |                                                   |           | 1.2        | (0.9-1.6) |
| Musculoskeletal or soft tissue disorder        |                                                                             |               | 6.6           | (-9.1-22.2)    |                                                 |           | 1.0        | (0.9-1.2) |                                                   |           | 0.8        | (0.6-1.1) |
| COPD                                           |                                                                             |               | 1.6           | (-16.4-19.5)   |                                                 |           | 1.1        | (0.9-1.3) |                                                   |           | 1.1        | (0.8-1.5) |
| Other substance use condition                  |                                                                             |               | 20.2*         | (1.5-38.8)     |                                                 |           | 1.0        | (0.9-1.2) |                                                   |           | 1.0        | (0.6-1.4) |
| Cardiac dysrhythmia                            |                                                                             |               | 39.7**        | (19.9-59.5)    |                                                 |           | 2.2**      | (1.8-2.6) |                                                   |           | 2.0**      | (1.5-2.6) |
| Kidney injury                                  |                                                                             |               | 27.4*         | (5.2-49.6)     |                                                 |           | 2.2**      | (1.8-2.6) |                                                   |           | 2.6**      | (2.0-3.4) |
| Diabetes mellitus                              |                                                                             |               | -9.2          | (-30.6-12.1)   |                                                 |           | 1.3**      | (1.1-1.6) |                                                   |           | 0.9        | (0.6-1.3) |
| Trauma                                         |                                                                             |               | 6.2           | (-16.6-29.1)   |                                                 |           | 1.6**      | (1.3-1.9) |                                                   |           | 1.7**      | (1.2-2.5) |
| Seizure                                        |                                                                             |               | 6.0           | (-17.8-29.8)   |                                                 |           | 1.9**      | (1.6-2.4) |                                                   |           | 1.4        | (0.9-2.1) |
| Pancreaticobiliary disease                     |                                                                             |               | 19.1          | (-5.3-43.5)    |                                                 |           | 1.2        | (1.0-1.5) |                                                   |           | 1.0        | (0.7-1.5) |
| Pneumonia                                      |                                                                             |               | 32.1*         | (3.1-61.1)     |                                                 |           | 3.4**      | (2.6-4.3) |                                                   |           | 6.7**      | (5.0-9.0) |
| Sepsis/Shock                                   |                                                                             |               | -19.8         | (-50.1-10.5)   |                                                 |           | 4.5**      | (3.5-5.8) |                                                   |           | 4.7**      | (3.5-6.4) |
| Congestive heart failure                       |                                                                             |               | -1.7          | (-35.5-32.1)   |                                                 |           | 1.4*       | (1.1-1.9) |                                                   |           | 1.6*       | (1.1-2.5) |
| Malignancy                                     |                                                                             |               | -4.7          | (-43.7-34.3)   |                                                 |           | 1.3        | (0.9-1.8) |                                                   |           | 1.3        | (0.8-2.3) |
| Cerebrovascular disease                        |                                                                             |               | -8.4          | (-51.1-34.3)   |                                                 |           | 1.5*       | (1.0-2.2) |                                                   |           | 1.6        | (0.9-2.7) |
| Myocardial infarction                          |                                                                             |               | 28.2          | (-21.4-77.7)   |                                                 |           | 3.4**      | (2.2-5.3) |                                                   |           | 3.8**      | (2.2-6.4) |
| Cumulative BZD <sup>a</sup> (for AWS Severity) |                                                                             |               | -             | -              |                                                 |           | 1.0**      | (1.0-1.0) |                                                   |           | 1.0**      | (1.0-1.0) |

Legend: ICU = intensive care unit, GI = Gastrointestinal, COPD = Chronic obstructive pulmonary disease, <sup>a</sup>mg-diazepam-equivalents, \*\* p<0.01, \* p<0.05

## SUPPLEMENTAL REFERENCES

1. Addolorato G, Leggio L, Abenavoli L, Agabio R, Caputo F, Capristo E, Colombo G, Gessa GL, Gasbarrini G. Baclofen in the Treatment of Alcohol Withdrawal Syndrome: A Comparative Study vs Diazepam. *Am J Medicine*. 2006;119(3):276.e13-276.e18.
2. Lyon JE, Khan RA, Gessert CE, Larson PM, Renier CM. Treating alcohol withdrawal with oral baclofen: A randomized, double-blind, placebo-controlled trial. *J Hosp Med*. 2011;6(8):469-474.
3. Gulati P, Chavan BS, Sidana A. Comparative efficacy of baclofen and lorazepam in the treatment of alcohol withdrawal syndrome. *Indian J Psychiat*. 2019;61(1):60-64.
4. Ritola E, Malinen L. A double-blind comparison of carbamazepine and clomethiazole in the treatment of alcohol withdrawal syndrome. *Acta Psychiat Scand*. 1981;64(3):254-259.
5. Agricola R, Mazzarino M, Urani R, Gallo V, Grossi E. Treatment of Acute Alcohol Withdrawal Syndrome with Carbamazepine: A Double-Blind Comparison with Tiapride. *J Int Med Res*. 1982;10(3):160-165.
6. Flygenring J, Hansen J, Holst B, Petersen E, Sørensen A. Treatment of alcohol withdrawal symptoms in hospitalized patients. *Acta Psychiat Scand*. 1984;69(5):398-408.
7. Malcolm R, Ballenger JC, Sturgis ET, Anton R. Double-blind controlled trial comparing carbamazepine to oxazepam treatment of alcohol withdrawal. *Am J Psychiat*. 1989;146(5):617-621.
8. Hillbom M, Tokola R, Kuusela V, Kärkkäinen P, Källi-Lemma L, Pilke A, Kaste M. Prevention of alcohol withdrawal seizures with carbamazepine and valproic acid. *Alcohol*. 1989;6(3):223-226.
9. Malcolm R, Myrick H, Roberts J, Wang W, Anton RF, Ballenger JC. The Effects of Carbamazepine and Lorazepam on Single versus Multiple Previous Alcohol Withdrawals in an Outpatient Randomized Trial. *J Gen Intern Med*. 2002;17(5):349-355.
10. Eyer F, Schreckenber M, Hecht D, Adorjan K, Schuster T, Felgenhauer N, Pfab R, Strubel T, Zilker T. Carbamazepine and Valproate as Adjuncts in the Treatment of Alcohol Withdrawal Syndrome: A Retrospective Cohort Study. *Alcohol Alcohol*. 2011;46(2):177-184.
11. Baumgartner GR. Clonidine Versus Chlordiazepoxide in Acute Alcohol Withdrawal: A Preliminary Report. *Southern Med J*. 1988;81(1):56-60.
12. Baumgartner GR, Rowen RC. Transdermal Clonidine Versus Chlordiazepoxide in Alcohol Withdrawal: A Randomized, Controlled Clinical Trial. *Southern Med J*. 1991;84(3):312-322.
13. Spies CD, Otter HE, Hüske B, Sinha P, Neumann T, Rettig J, Lenzenhuber E, Kox WJ, Sellers EM. Alcohol withdrawal severity is decreased by symptom-orientated adjusted bolus therapy in the ICU. *Intens Care Med*. 2003;29(12):2230-2238.
14. Ludtke KA, Stanley KS, Yount NL, Gerkin RD. Retrospective Review of Critically Ill Patients Experiencing Alcohol Withdrawal: Dexmedetomidine Versus Propofol and/or Lorazepam Continuous Infusions. *Hosp Pharm*. 2015;50(3):208-213.
15. Bielka K, Kuchyn I, Glumcher F. Addition of dexmedetomidine to benzodiazepines for patients with alcohol withdrawal syndrome in the intensive care unit: a randomized controlled study. *Ann Intensive Care*. 2015;5(1):33.
16. Crispo AL, Daley MJ, Pepin JL, Harford PH, Brown CVR. Comparison of clinical outcomes in nonintubated patients with severe alcohol withdrawal syndrome treated with continuous-infusion sedatives: dexmedetomidine versus benzodiazepines. *Pharmacotherapy*. 2014;34(9):910-917.
17. Lizotte RJ, Kappes JA, Bartel BJ, Hayes KM, Lesselyoung VL. Evaluating the effects of dexmedetomidine compared to propofol as adjunctive therapy in patients with alcohol withdrawal. *Clin Pharmacol Adv Appl*. 2014;6:171-177.

18. Mueller SW, Preslaski CR, Kiser TH, Fish DN, Lavelle JC, Malkoski SP, MacLaren R. A Randomized, Double-Blind, Placebo-Controlled Dose Range Study of Dexmedetomidine as Adjunctive Therapy for Alcohol Withdrawal\*. *Crit Care Med*. 2014;42(5):1131-1139.
19. Rayner SG, Weinert CR, Peng H, Jepsen S, Broccard AF, Institution S. Dexmedetomidine as adjunct treatment for severe alcohol withdrawal in the ICU. *Ann Intensive Care*. 2012;2(1):12.
20. Tolonen J, Rossinen J, Alho H, Harjola V-P. Dexmedetomidine in addition to benzodiazepine-based sedation in patients with alcohol withdrawal delirium. *Eur J Emerg Med*. 2013;20(6):425-427.
21. VanderWeide LA, Foster CJ, MacLaren R, Kiser TH, Fish DN, Mueller SW. Evaluation of Early Dexmedetomidine Addition to the Standard of Care for Severe Alcohol Withdrawal in the ICU. *J Intensive Care Med*. 2014;31(3):198-204.
22. Frazee EN, Personett HA, Leung JG, Nelson S, Dierkhising RA, Bauer PR. Influence of dexmedetomidine therapy on the management of severe alcohol withdrawal syndrome in critically ill patients. *J Crit Care*. 2013;29(2):298-302.
23. Weinberg JA, Magnotti LJ, Fischer PE, Edwards NM, Schroepfel T, Fabian TC, Croce MA. Comparison of Intravenous Ethanol Versus Diazepam for Alcohol Withdrawal Prophylaxis in the Trauma ICU; Results of a Randomized Trial. *J Trauma Inj Infect Critical Care*. 2008;64(1):99-104.
24. Fullwood JE, Mostaghimi Z, Granger CB, Washam JB, Bride W, Zhao Y, Granger BB. Alcohol Withdrawal Prevention: A Randomized Evaluation of Lorazepam and Ethanol—A Pilot Study. *Am J Crit Care*. 2013;22(5):398-406.
25. Gipson G, Tran K, Hoang C, Treggiari M. Comparison of enteral ethanol and benzodiazepines for alcohol withdrawal in neurocritical care patients. *J Clin Neurosci*. 2016;31:88-91.
26. Mariani JJ, Rosenthal RN, Tross S, Singh P, Anand OP. A Randomized, Open-Label, Controlled Trial of Gabapentin and Phenobarbital in the Treatment of Alcohol Withdrawal. *Am J Addict*. 2006;15(1):76-84.
27. Levine AR, Carrasquillo L, Mueller J, Nounou MI, Naut ER, Ibrahim D. High-Dose Gabapentin for the Treatment of Severe Alcohol Withdrawal Syndrome: A Retrospective Cohort Analysis. *Pharmacotherapy*. 2019;39(9):881-888.
28. Leung JG, Rakocevic DB, Allen ND, et al. Use of a Gabapentin Protocol for the Management of Alcohol Withdrawal: A Preliminary Experience Expanding From the Consultation-Liaison Psychiatry Service. *Psychosomatics*. 2018;59(5):496-505.
29. Andaluz A, DeMoss D, Claassen C, Blair S, Hsu J, Bakre S, Khan M, Atem F, Rush AJ. Fixed-dose gabapentin augmentation in the treatment of alcohol withdrawal syndrome: a retrospective, open-label study. *Am J Drug Alcohol Abus*. 2019;46(1):1-9.
30. Nichols TA, Robert S, Taber DJ, Cluver J. Alcohol withdrawal-related outcomes associated with gabapentin use in an inpatient psychiatric facility. *Ment Health Clin*. 2019;9(1):1-5.
31. Wong A, Benedict NJ, Armahizer MJ, Kane-Gill SL. Evaluation of adjunctive ketamine to benzodiazepines for management of alcohol withdrawal syndrome. *Ann Pharmacother*. 2014;49(1):14-19.
32. Pizon AF, Lynch MJ, Benedict NJ, Yanta JH, Frisch A, Menke NB, Swartzentruber GS, King AM, Abesamis MG, Kane-Gill SL. Adjunct Ketamine Use in the Management of Severe Ethanol Withdrawal. *Crit Care Med*. 2018;46(8):e768-e771.
33. Shah P, McDowell M, Ebisu R, Hanif T, Toerne T. Adjunctive Use of Ketamine for Benzodiazepine-Resistant Severe Alcohol Withdrawal: a Retrospective Evaluation. *J Medical Toxicol*. 2018;14(3):229-236.
34. Croissant B, Loeber S, Diehl A, Nakovics H, Wagner F, Kiefer F, Mann K. Oxcarbazepine in Combination with Tiaprid in Inpatient Alcohol-withdrawal – a RCT. *Pharmacopsychiatry*. 2009;42(05):175-181.
35. Gold JA, Rimal B, Nolan A, Nelson LS. A strategy of escalating doses of benzodiazepines and phenobarbital administration reduces the need for mechanical ventilation in delirium tremens. *Crit Care Med*. 2007;35(3):724-730.

36. Tidwell WP, Thomas TL, Pouliot JD, Canonico AE, Webber AJ. Treatment of Alcohol Withdrawal Syndrome: Phenobarbital vs CIWA-Ar Protocol. *Am J Crit Care*. 2018;27(6):454-460.
37. Hendey GW, Dery RA, Barnes RL, Snowden B, Mentler P. A prospective, randomized, trial of phenobarbital versus benzodiazepines for acute alcohol withdrawal. *Am J Emerg Medicine*. 2011;29(4):382-385.
38. Rosenson J, Clements C, Simon B, Vieaux J, Graffman S, Vahidnia F, Cisse B, Lam J, Alter H. Phenobarbital for acute alcohol withdrawal: a prospective randomized double-blind placebo-controlled study. *J Emerg Medicine*. 2013;44(3):592-598.
39. Nisavic M, Nejad SH, Isenberg BM, Bajwa EK, Currier P, Wallace PM, Velmahos G, Wilens T. Use of Phenobarbital in Alcohol Withdrawal Management – A Retrospective Comparison Study of Phenobarbital and Benzodiazepines for Acute Alcohol Withdrawal Management in General Medical Patients. *Psychosomatics*. 2019;60(5):458-467.
40. Förg A, Hein J, Volkmar K, Winter M, Richter C, Heinz A, Müller CA. Efficacy and Safety of Pregabalin in the Treatment of Alcohol Withdrawal Syndrome: A Randomized Placebo-Controlled Trial. *Alcohol Alcohol*. 2012;47(2):149-155.
41. Wong A, Benedict NJ, Lohr BR, Pizon AF, Kane-Gill SL. Management of benzodiazepine-resistant alcohol withdrawal across a healthcare system: Benzodiazepine dose-escalation with or without propofol. *Drug Alcohol Depend*. 2015;154:296-299.
42. Lorentzen K, Lauritsen AØ, Bendtsen AO. Use of propofol infusion in alcohol withdrawal-induced refractory delirium tremens. *Dan Med J*. 2014;61(5):A4807.
43. Sohraby R, Attridge RL, Hughes DW. Use of Propofol-Containing Versus Benzodiazepine Regimens for Alcohol Withdrawal Requiring Mechanical Ventilation. *Ann Pharmacother*. 2014;48(4):456-461.
44. Lambie DG, Johnson RH, Vijayaseenan ME, Whiteside EA. Sodium Valproate in the Treatment of the Alcohol Withdrawal Syndrome. *Australian New Zealand J Psychiatry*. 1980;14(3):213-215.
45. Rosenthal RN, Perkel C, Singh P, Anand O, Miner CR. A Pilot Open Randomized Trial of Valproate and Phenobarbital in the Treatment of Acute Alcohol Withdrawal. *Am J Addict*. 1998;7(3):189-197.
46. Myrick H, Brady KT, Malcolm R. Divalproex in the Treatment of Alcohol Withdrawal. *Am J Drug Alcohol Abus*. 2000;26(1):155-160.
47. Reoux JP, Saxon AJ, Malte CA, Baer JS, Sloan KL. Divalproex sodium in alcohol withdrawal: a randomized double-blind placebo-controlled clinical trial. *Alcohol Clin Exp Res*. 2001;25(9):1324-1329.
48. Eyer F, Schuster T, Felgenhauer N, Pfab R, Strubel T, Saugel B, Zilker T. Risk Assessment of Moderate to Severe Alcohol Withdrawal - Predictors for Seizures and Delirium Tremens in the Course of Withdrawal. *Alcohol Alcohol*. 2011;46(4):427-433.
49. Maldonado JR. Novel Algorithms for the Prophylaxis and Management of Alcohol Withdrawal Syndromes-Beyond Benzodiazepines. *Crit Care Clin*. 2017;33(3):559-599.
50. Wong J, Saver B, Scanlan JM, Gianutsos LP, Bhakta Y, Walsh J, Plawman A, Sapienza D, Rudolf V. The ASAM Clinical Practice Guideline on Alcohol Withdrawal Management. *J Addict Med*. 2020;14(3S Suppl 1):1-72.
